# Supplementary material
Source: PubMed Central journal article supplement (PMC3161587)
Supplement: 1101951108_pnas.1101951108_SI.pdf [file 1101951108_pnas.1101951108_SI.pdf]

# Supporting Information

Achar et al. 10.1073/pnas.1101951108

## SI Materials and Methods

**Proteins.** Wild-type helicase-like transcription factor (HLTF) and ATPase mutant DE557,558AA HLTF were purified to apparent homogeneity after being overexpressed as GST-FLAG-fusion proteins in yeast using plasmids PIL1520 and PIL1734, respectively, as described (1, 2). Human Bloom helicase (BLM) was overexpressed as a GST-FLAG-fusion protein in yeast using plasmid pIL1863. BLM purification was carried out in a buffer containing 50 mM KPO<sub>4</sub>, 500 mM KCl, 10% Glycerol, 1 mM EDTA, 1 mM DTT, and 0.01% NP40 on glutathione-Sepharose 4B beads. After elution by PreScission protease cleavage, apparently 95% homogeneous FLAG-human BLM was obtained. *Escherichia coli* E111Q EcoRI endonuclease mutant protein was purified from an overproducing bacterial strain by a two-column procedure as described in ref. 3. Human replication protein A (RPA), human proliferating cell nuclear antigen (PCNA) and yeast replication factor C (RFC) were purified as previously described (4, 5). *E. coli* ssDNA-binding protein (SSB) was purchased from USB Corporation.

**DNA Substrates.** Oligonucleotide-based DNA substrates were generated by annealing highly purified oligonucleotides in various combinations, followed by purification on polyacrylamide gels as described previously (2). The term homologous fork (HomF) indicates forks with complementary leading and lagging arms, whereas gap substrate (GapHomF) indicates a homologous fork with a 15-nt gap in the leading arm toward the junction. Oligonucleotides were used in the following combinations to generate respective substrates, in which underlined oligonucleotide(s) are <sup>32</sup>P-labeled at the 5'-end:

HomF: O1054/ O1056/ O1058/ O1118

GapHomF: O1055/ O1244/ O1058/ O1118

HomF-Biotin: O1054/ O1056/ O1058/ O1118-Biotin

EcoRI site on base: O2809/ O2810/ O1058/ O1118

Trap duplex: O1118/ O1058

Oligonucleotide sequences were as follows:

O1054:

AgCTACCATgCCTgCCTCAAgaATTCgTAA

O1056:

TTACgAATTCTTgAggCAggCATggTAGCT

O1058:

AgCTACCATgCCTgCCTCAAgaATTCgTAATATgCCTAC-

ACTggAgTACCggAgCATCgTCgTgACTgggAAAAC

O1118:

gTTTTCCCAgTCACgACgATgCTCCggTACTC-

CAGTgTAGgCATATTACgAATTCTTgAggCAggCATggTAGCT

O1055:

AgCTACCATgCCTgCCTCAAgaAATT

O1244:

TgTAGgCATATTACgAATTCTTgAggCAggCATggTAGCT

O2809

AATATgCCTACACTggAgTACCggAgCATCgTCgTgACTgg-

gAAAAC

O2810

gTTTTCCCAgTCACgACgATgCTCCggTACTCCAgTgTAGg-

CATATT

**Fork Reversal Assay on Plasmid-Sized Replication Fork Model Substrate.** The plasmid-sized replication fork model substrate was created essentially as described (2, 6). Briefly, pG46 and pG68 plasmids were gapped by digestion with nicking endonucleases Nt.BbvCI and Nb.BbvCI yielding pG46B and pG68A, respectively. pG46B was then treated with shrimp alkaline phosphatase and subsequently labeled with T4 polynucleotide kinase to yield the plasmid pG46B'. pG68A was linearized with XhoI digestion to yield pG68A Xh. The resulting plasmids containing complementary single stranded gaps were then annealed together at 53 °C in a buffer containing 50 mM Tris-HCl pH 7.5, 10 mM MgCl<sub>2</sub>, and 5 mM DTT to form a joint molecule (Fig S7A). Note, that the joint molecule contains a structural mimic of a stalled replication fork in which the labeled lagging strand is longer by 14 nucleotides. Assays with the plasmid-sized forks were carried out essentially as described in *Materials and Methods* but using 5 nM substrate DNA, which was either naked or preincubated with PCNA (640 nM) and RFC (640 nM) at 37 °C for 15 min followed by incubation with HLTF (80 nM) for 15 min at 37 °C. Reaction mixtures were quenched after incubation and analyzed by restriction enzyme digestion as described previously (2, 6).

1. Unk I, et al. (2008) Human HLTF functions as a ubiquitin ligase for proliferating cell nuclear antigen polyubiquitination. *Proc Natl Acad Sci USA* 105:3768–3773.
2. Blastyak A, Hajdu I, Unk I, Haracska L (2010) Role of double-stranded DNA translocase activity of human HLTF in replication of damaged DNA. *Mol Cell Biol* 30:684–693.
3. Wright DJ, King K, Modrich P (1989) The negative charge of Glu-111 is required to activate the cleavage center of EcoRI endonuclease. *J Biol Chem* 264:11816–11821.

4. Unk I, et al. (2006) Human SHPRH is a ubiquitin ligase for Mms2-Ubc13-15 dependent polyubiquitylation of proliferating cell nuclear antigen. *Proc Natl Acad Sci USA* 103:18107–18112.
5. Henricksen LA, Umbricht CB, Wold MS (1994) Recombinant replication protein A: Expression, complex formation, and functional characterization. *J Biol Chem* 269:11121–11132.
6. Ralf C, Hickson ID, Wu L (2006) The Bloom's syndrome helicase can promote the regression of a model replication fork. *J Biol Chem* 281:22839–22846.
